# Supplementary material for: Manipulating interstitial carbon atoms in the nickel octahedral site for highly efficient hydrogenation of alkyne
Source: PubMed Central journal article supplement (PMC7335178; doi:10.1038/s41467-020-17188-3), 2020-07-03
Supplement: 41467_2020_17188_MOESM1_ESM.pdf [file 41467_2020_17188_MOESM1_ESM.pdf]

## **Supplementary Information**

### **Manipulating interstitial carbon atoms in the nickel octahedral site for highly efficient hydrogenation of alkyne**

Niu et al.

## Supplementary Figures

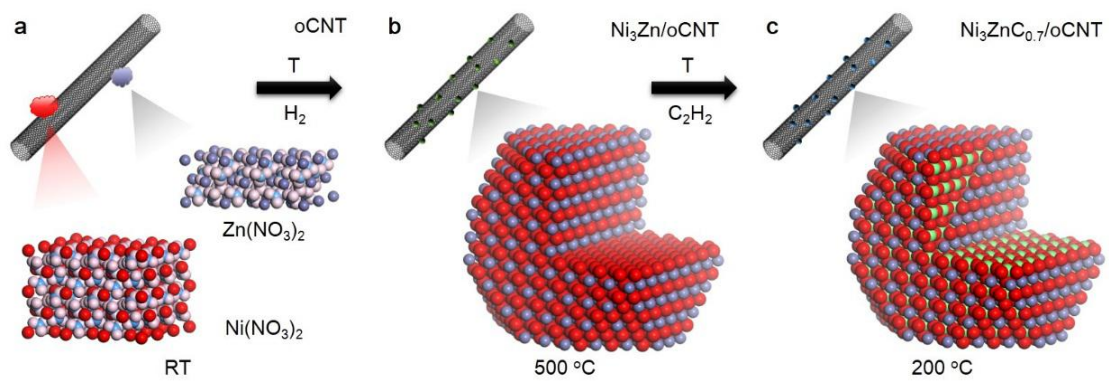

Supplementary Figure 1. Schematic diagram of preparation process.

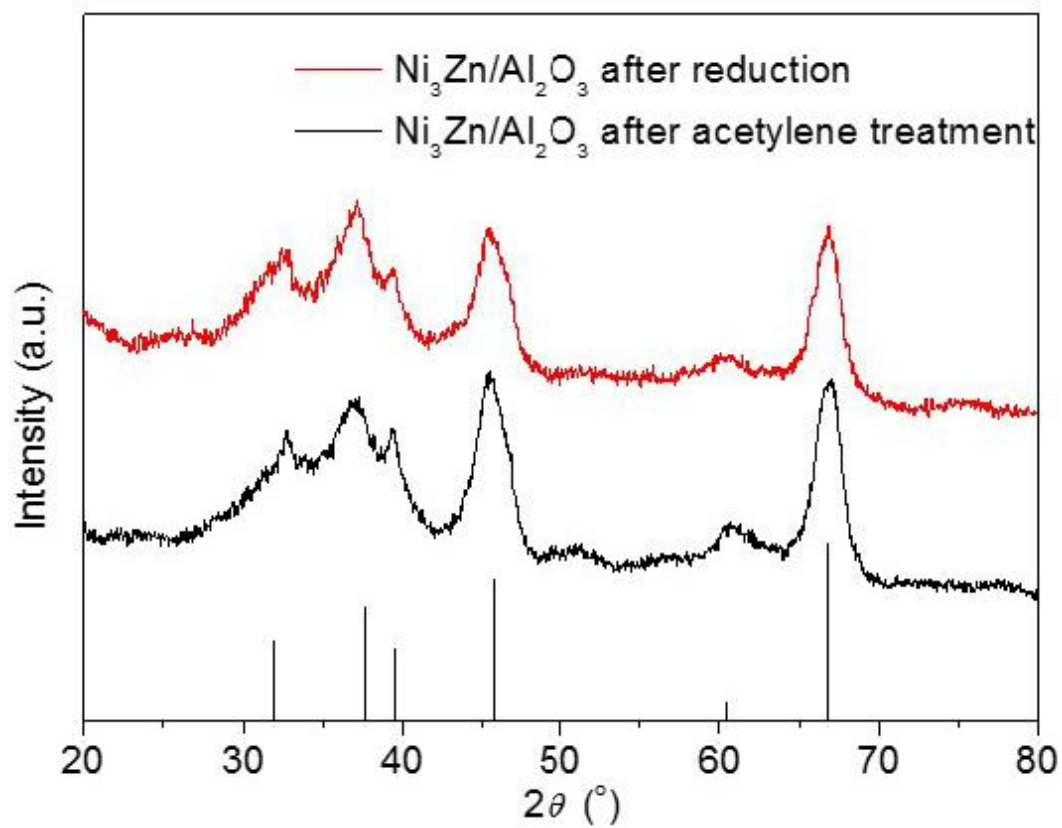

**Supplementary Figure 2.** XRD patterns of  $\text{Al}_2\text{O}_3$  supported Ni/Zn NPs after 500  $^{\circ}\text{C}$  hydrogen and 200  $^{\circ}\text{C}$  acetylene treatment. The black diffraction lines are indexed as  $\text{Al}_2\text{O}_3$  (JCPDS No. 29-0063).

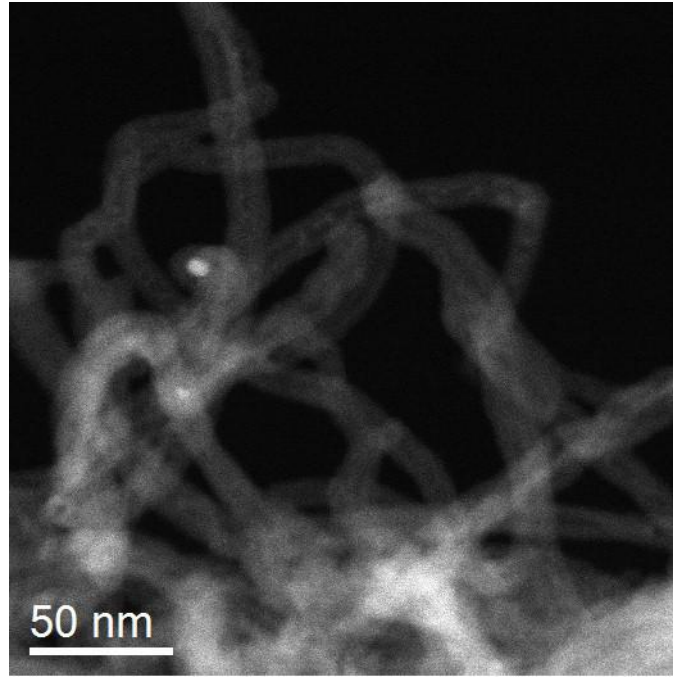

**Supplementary Figure 3.** STEM image of oCNT after impregnation with Ni and Zn salts.

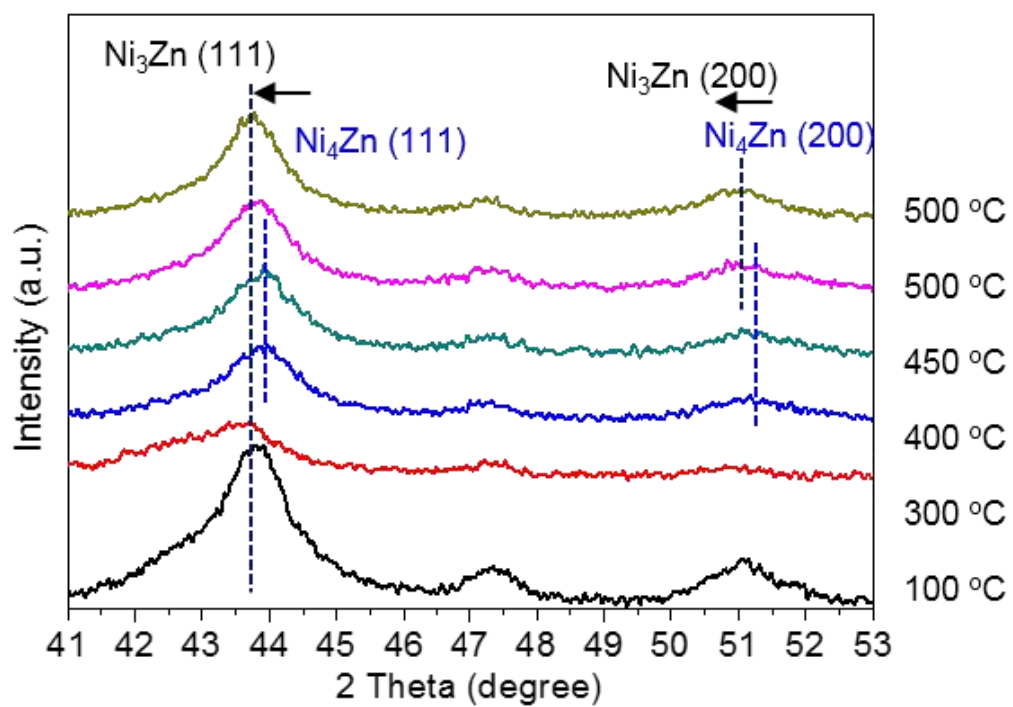

**Supplementary Figure 4.** In situ XRD patterns of the structural evolution of Ni<sub>3</sub>Zn/oCNT under a 10.0 vol.% H<sub>2</sub>/He atmosphere.

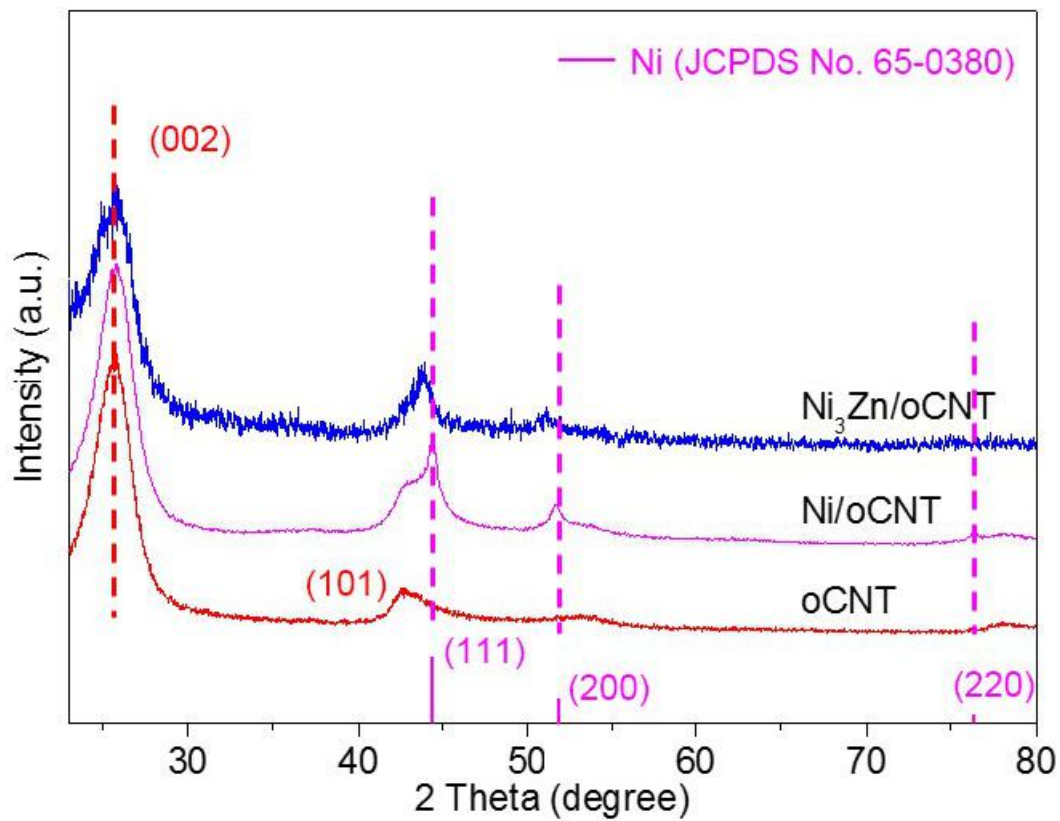

**Supplementary Figure 5.** XRD patterns of oCNT, Ni/oCNT and  $\text{Ni}_3\text{Zn}/\text{oCNT}$  after reduction for 2 h at 500 °C. The magenta diffraction lines are indexed as Ni (JCPDS No. 65-0380).

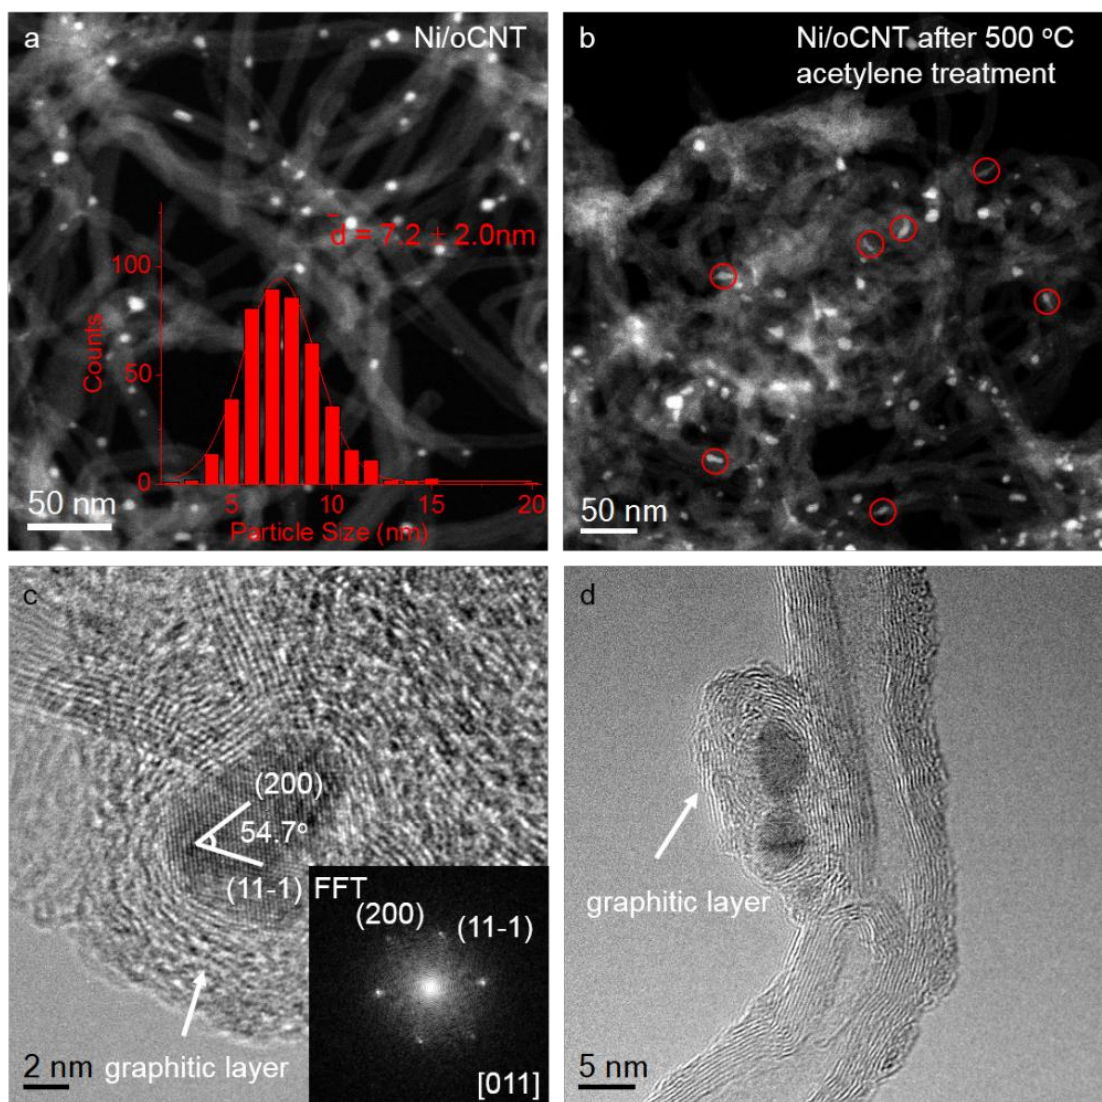

**Supplementary Figure 6.** HAADF-STEM image and particle size distribution (PSD) of Ni/oCNT (a) and after 500 °C acetylene treatment (b). HRTEM images of the encapsulated Ni NPs (c, d), the right-down inset in c is the corresponding FFT.

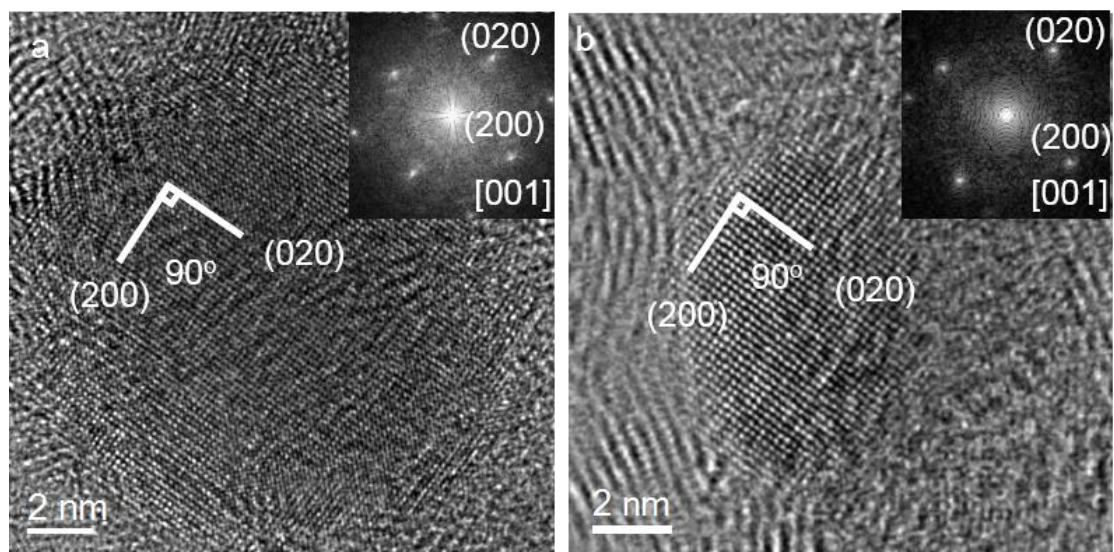

**Supplementary Figure 7.** HRTEM images acquired from [001] zone axis for Ni<sub>3</sub>Zn/oCNT (a) and Ni<sub>3</sub>ZnC<sub>0.7</sub>/oCNT (b) catalysts, respectively. The insets in (a) and (b) are the corresponding FFTs.



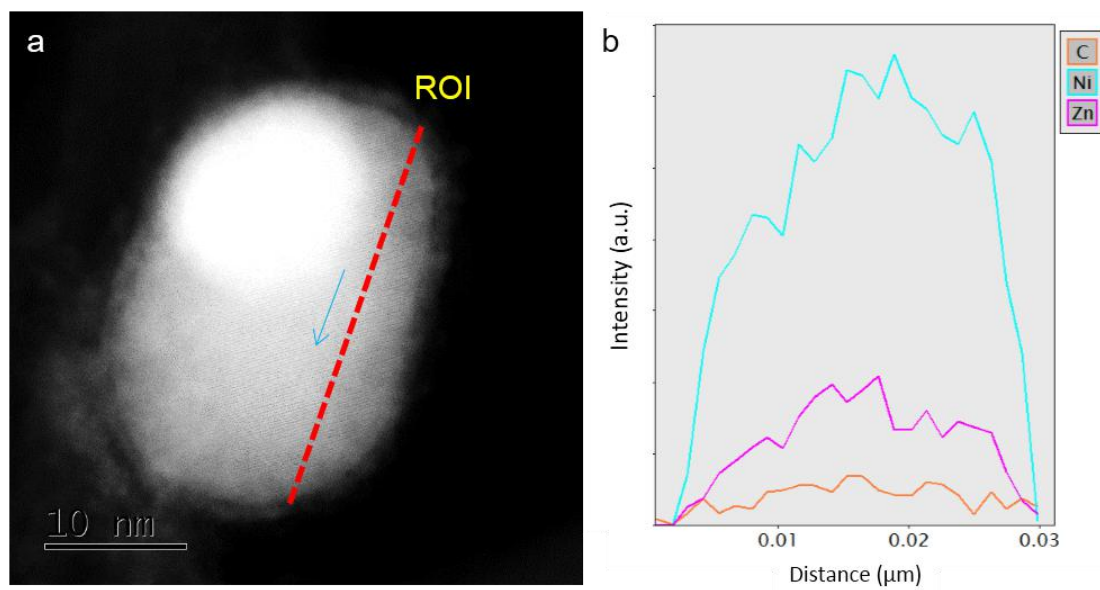

**Supplementary Figure 8.** STEM image (a) and corresponding EDX line profiles (b) of  $\text{Ni}_3\text{ZnCo}_{0.7}$  structure, which clearly reveal a uniform distribution and stoichiometric ratio of C, Ni and Zn across the nanoparticle.

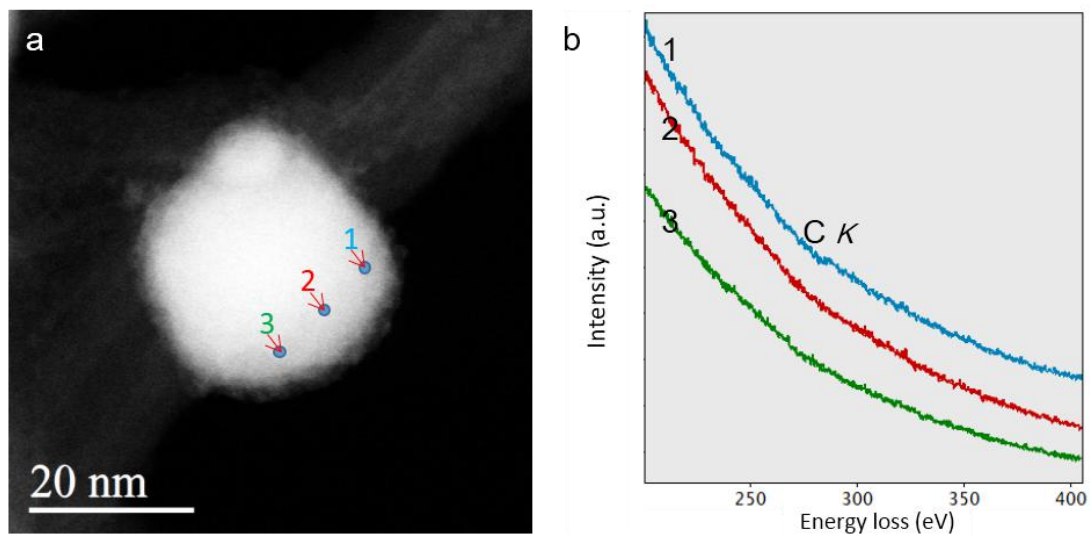

**Supplementary Figure 9.** STEM image (a) of Ni<sub>3</sub>Zn/oCNT and the corresponding EEL spectra (b) recorded from different spots of the nanoparticle barely show carbon signal. The weak carbon *K* edge shown in the 1<sup>st</sup> spectrum is considerably due to the surface carbon species as a result of carbon contamination.

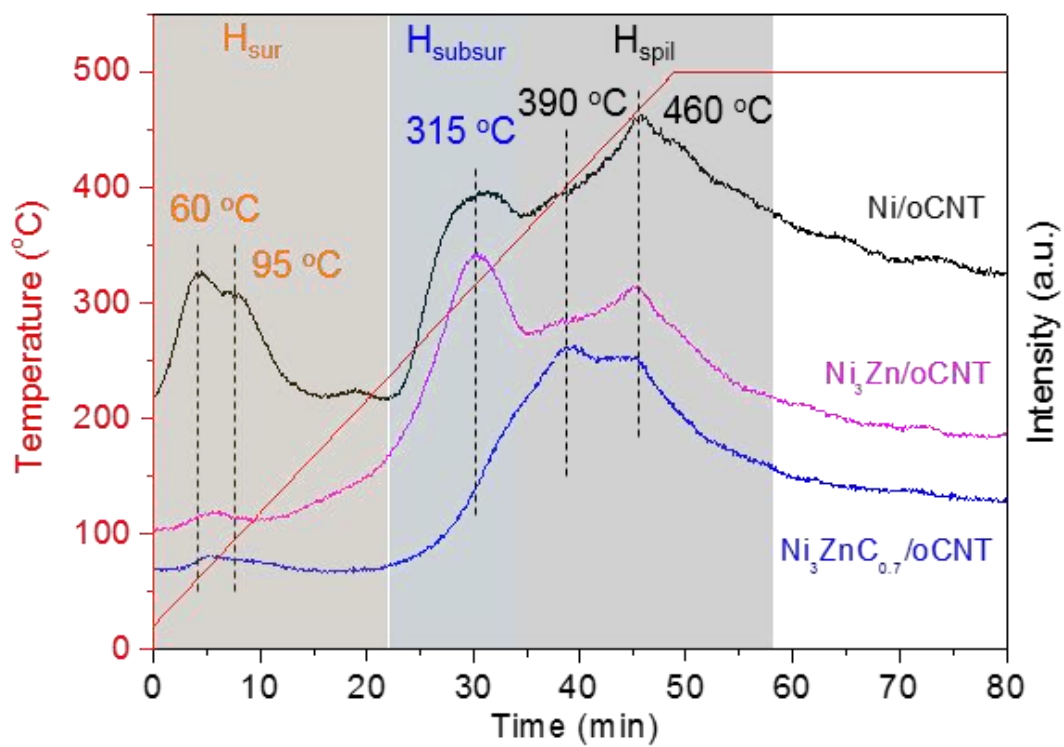

**Supplementary Figure 10.**  $H_2$ -TPD-MS results of Ni/oCNT,  $Ni_3Zn/oCNT$ , and  $Ni_3ZnC_{0.7}/oCNT$  catalysts at elevated temperatures under He atmosphere.

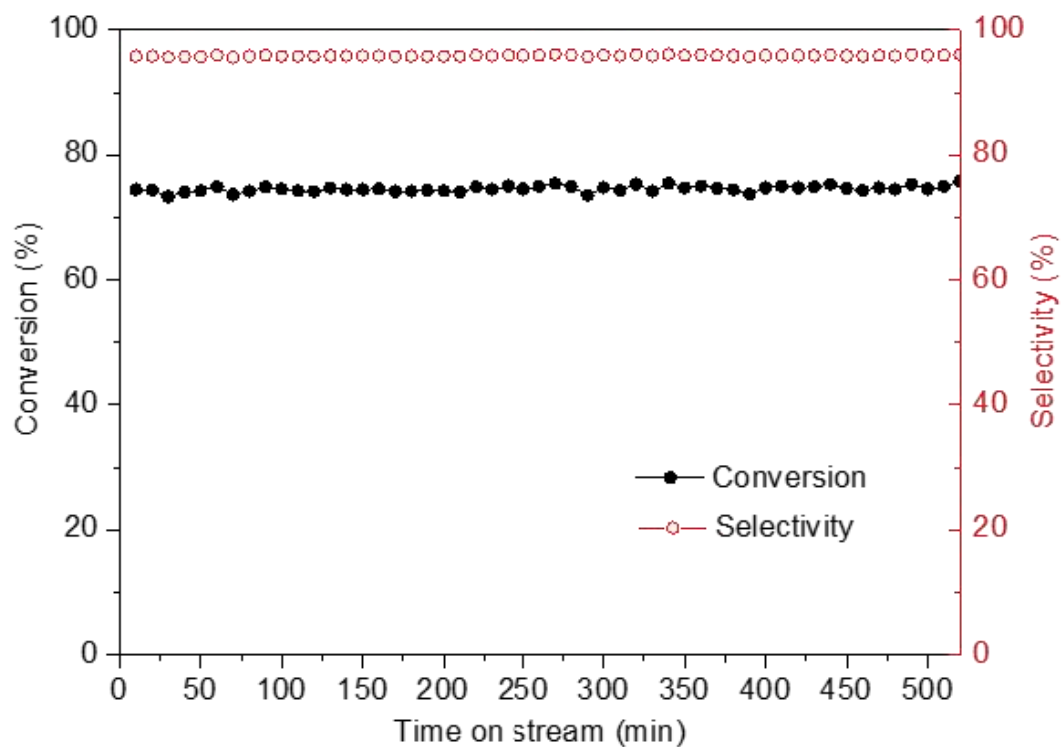

**Supplementary Figure 11.** Stability test of Ni<sub>3</sub>ZnC<sub>0.7</sub>/oCNT catalyst at low acetylene conversion. The solid and empty symbols represent the acetylene conversion and the selectivity towards ethylene. Reaction temperature: 200 °C; Reaction conditions: 4.5 vol.% H<sub>2</sub>, 20 vol.% C<sub>2</sub>H<sub>4</sub>, 0.5 vol.% C<sub>2</sub>H<sub>2</sub>, helium as balance, GHSV = 360,000 ml g<sub>cat</sub><sup>-1</sup> h<sup>-1</sup>.

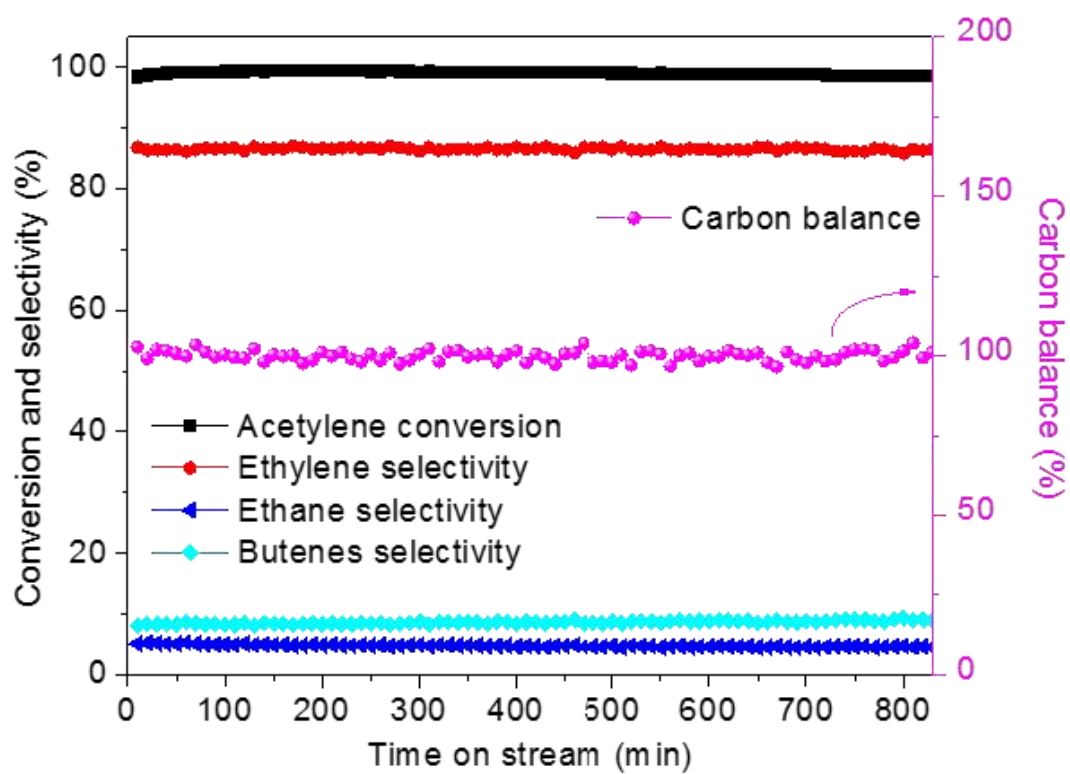

**Supplementary Figure 12.** Stability test of  $\text{Ni}_3\text{ZnC}_{0.7}/\text{oCNT}$  catalyst in the absence of ethylene. Reaction temperature: 200 °C; Reaction conditions: 9.0 vol.%  $\text{H}_2$ , 1.0 vol.%  $\text{C}_2\text{H}_2$ , helium as balance, GHSV = 60,000  $\text{ml g}_{\text{cat}}^{-1} \text{h}^{-1}$ .

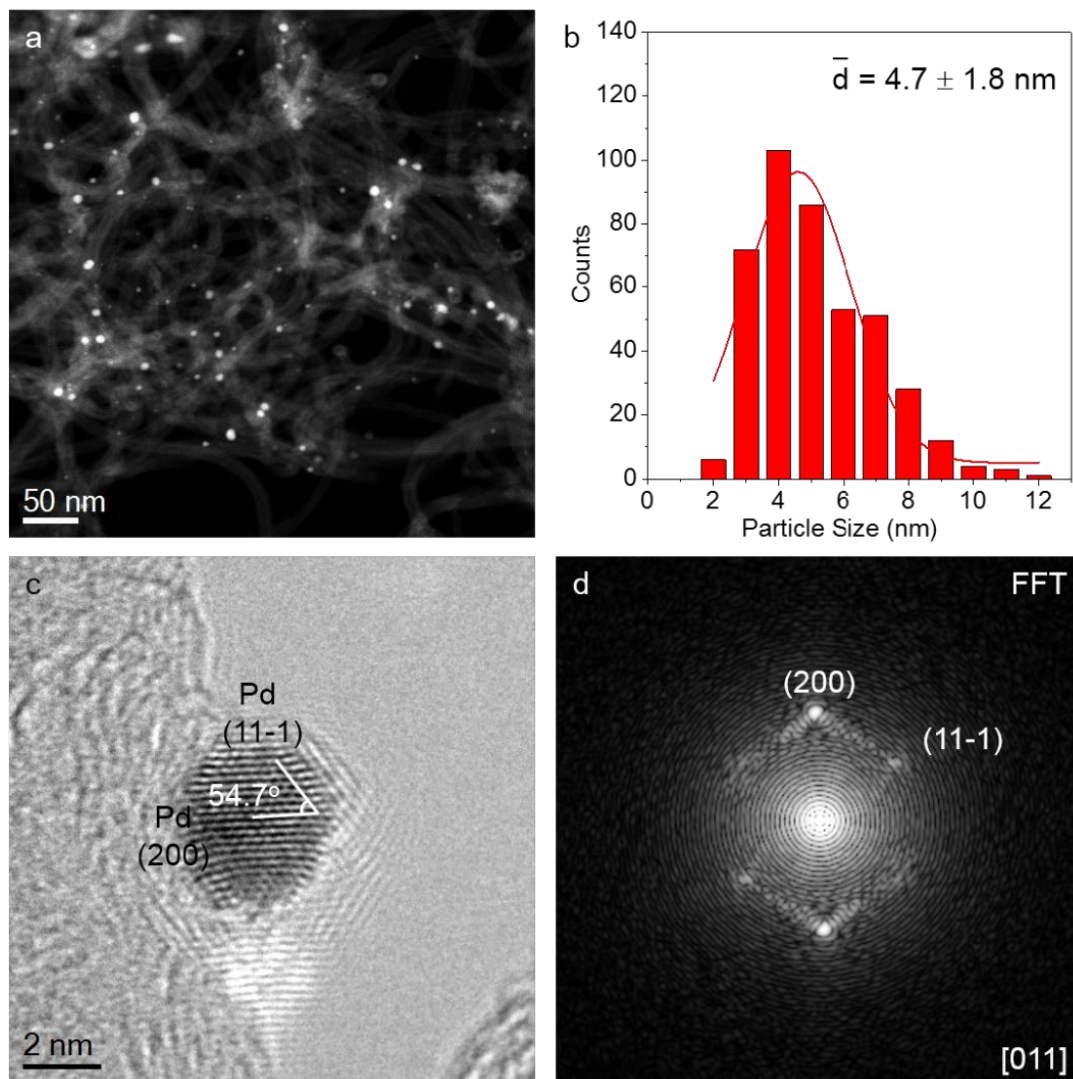

**Supplementary Figure 13.** STEM image (a) of Pd/oCNT sample after reduction at 500 °C. The corresponding PSD histogram (b) shows that the size of Pd NPs ranges from 2.0 to 12.0 nm with the average diameter is  $\sim 4.7 \pm 1.8$  nm. HRTEM image (c) of Pd/oCNT and the corresponding FFT (d).

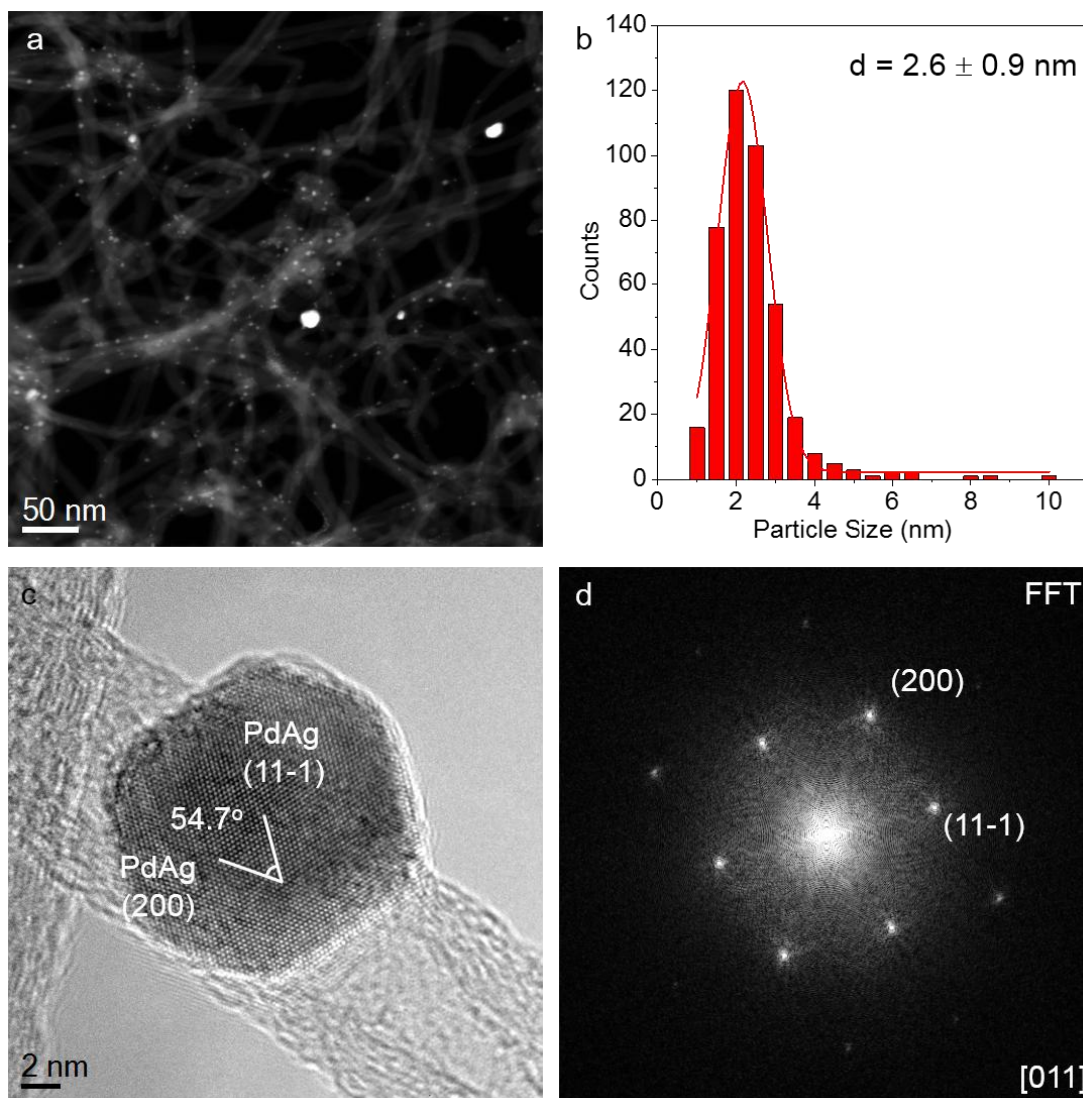

**Supplementary Figure 14.** STEM image (a) of PdAg/oCNT sample after reduction at 500 °C. The corresponding PSD histogram (b) shows that the size of PdAg NPs ranges from 1.0 to 10.0 nm with the average diameter is  $\sim 2.6 \pm 0.9$  nm. HRTEM image (c) of PdAg/oCNT and the corresponding FFT (d).

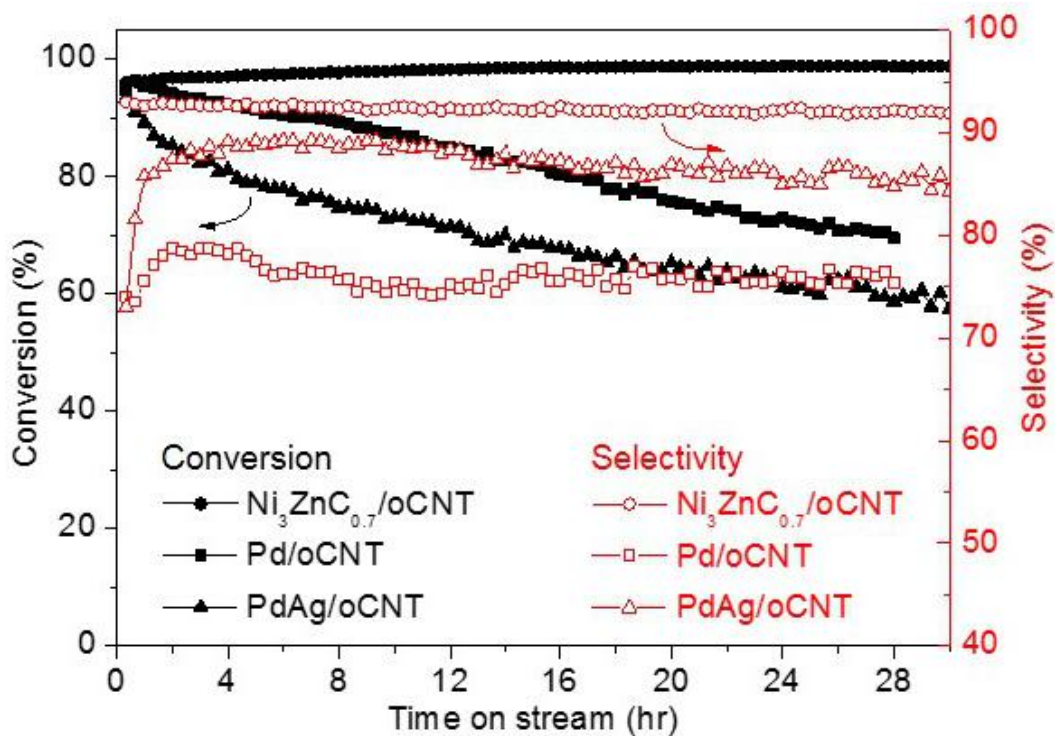

**Supplementary Figure 15.** Stability test of Pd/oCNT (0.02 mg), PdAg/oCNT (0.02 mg) and Ni<sub>3</sub>ZnC<sub>0.7</sub>/oCNT (10.0 mg) catalysts. The solid and empty symbols represent the acetylene conversion and the selectivity towards ethylene. Reaction temperature: 200 °C; Reaction conditions: 4.5 vol.% H<sub>2</sub>, 20 vol.% C<sub>2</sub>H<sub>4</sub>, 0.5 vol.% C<sub>2</sub>H<sub>2</sub>, helium as balance, flow rate = 40 mL min<sup>-1</sup> for Ni<sub>3</sub>ZnC<sub>0.7</sub>/oCNT, 20 mL min<sup>-1</sup> for Pd/oCNT and PdAg/oCNT.



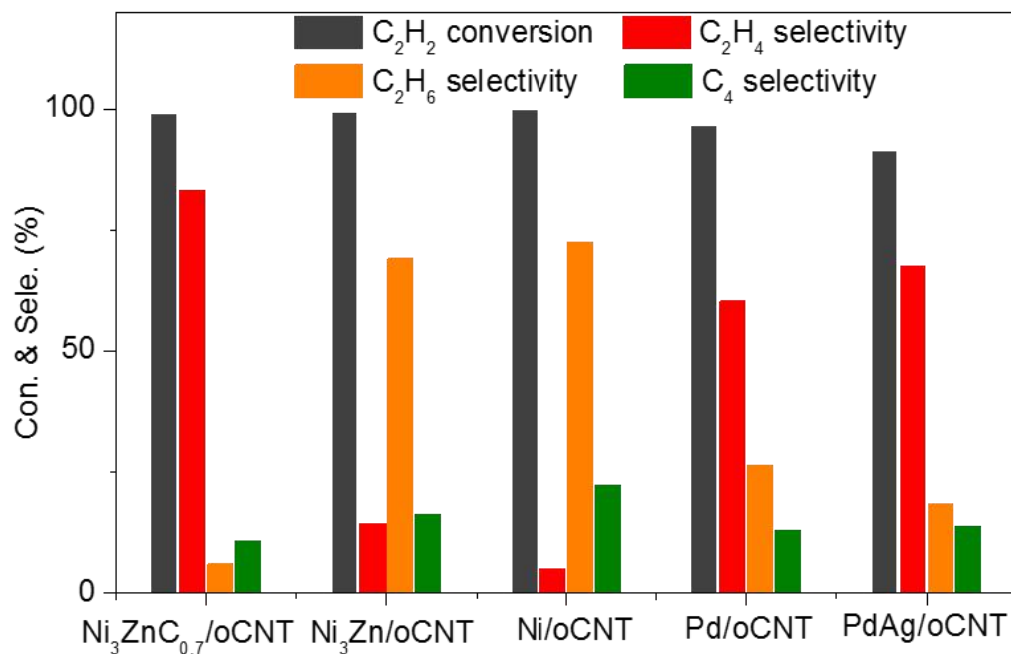

**Supplementary Figure 16.** Acetylene conversion, ethylene, ethane and butenes selectivity of Ni<sub>3</sub>ZnC<sub>0.7</sub>/oCNT, Ni<sub>3</sub>Zn/oCNT, Ni/oCNT, Pd/oCNT and PdAg/oCNT samples. Reaction temperature: 200 °C; Reaction conditions: 4.5 vol.% H<sub>2</sub>, 20 vol.% C<sub>2</sub>H<sub>4</sub>, 0.5 vol.% C<sub>2</sub>H<sub>2</sub>, helium as balance, flow rate = 40 mL min<sup>-1</sup>.

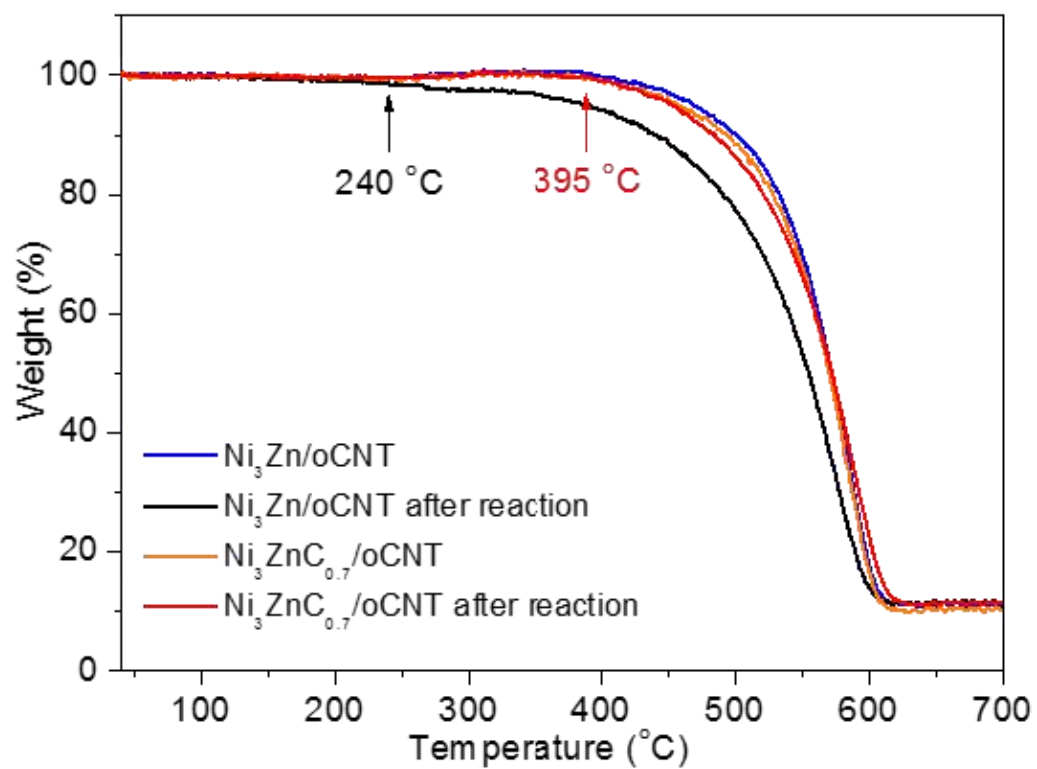

**Supplementary Figure 17.** TGA results of Ni<sub>3</sub>Zn/oCNT and Ni<sub>3</sub>ZnC<sub>0.7</sub>/oCNT catalysts before and after reaction as a function of temperature under 50% O<sub>2</sub>/Ar atmosphere.

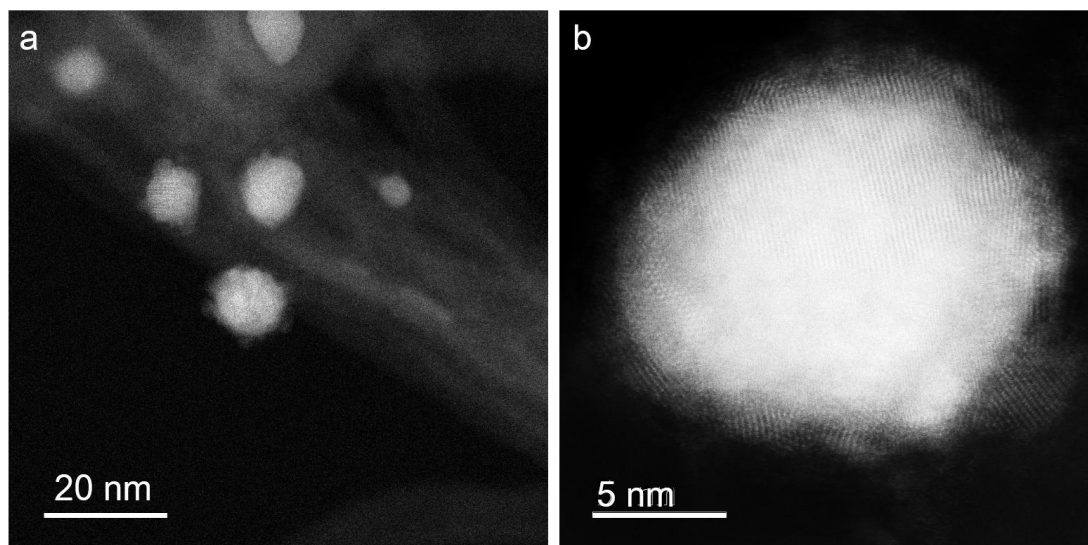

**Supplementary Figure 18.** Typical (a) and high resolution (b) STEM images of  $\text{Ni}_3\text{ZnC}_{0.7}/\text{oCNT}$  sample after reaction.

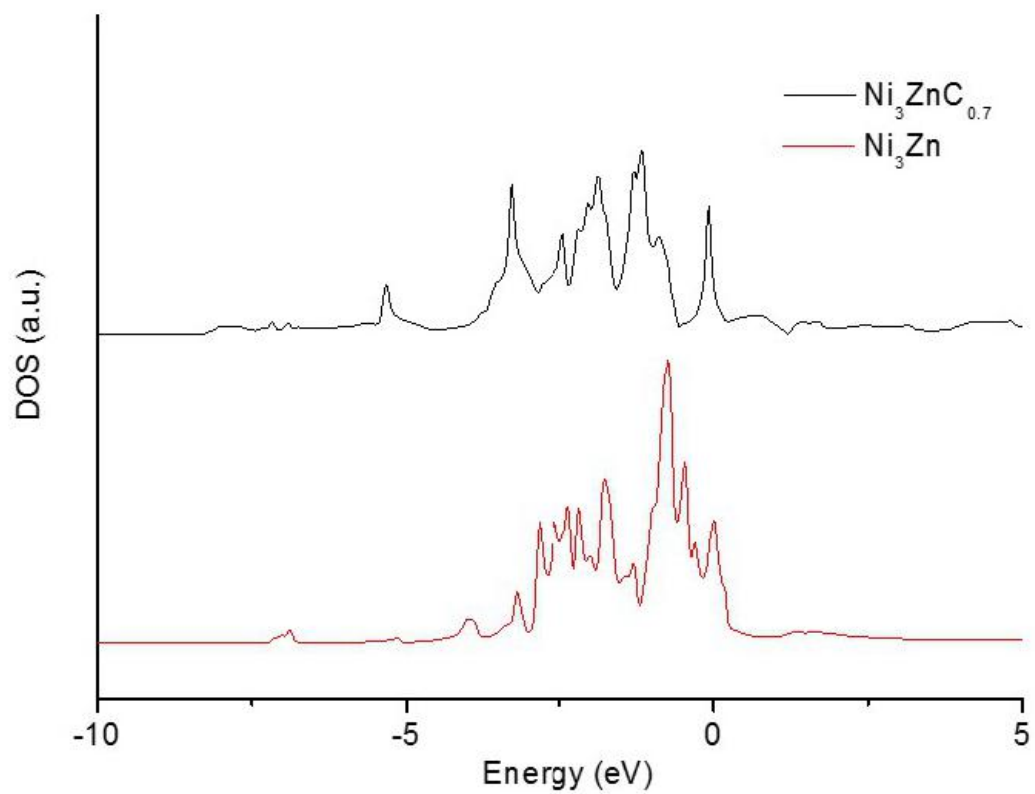

**Supplementary Figure 19.** The density of state of  $\text{Ni}_3\text{Zn}$  and  $\text{Ni}_3\text{ZnC}_{0.7}$  structure.

## Supplementary Notes

**Supplementary Note 1.** The desorption temperature of H<sub>2</sub> in Ni-based catalysts in Supplementary Fig. 10 could be divided to three parts. The low (0-200 °C) and high (above 350 °C) temperature regions, which are distributed in all of the catalysts, could be ascribed to the surface bonded H and the spillover H on the support according to previous studies<sup>1,2</sup>, respectively. However, the identification of desorption peak appears at medium temperature region, which emerges at 315 °C for Ni and Ni<sub>3</sub>Zn catalysts, is ambiguous. In addition, the desorption of subsurface interstitial H in Ni supported catalysts at elevated temperatures has been barely studied. Thus, based on previous theory calculation studies<sup>3</sup> and our experimental results, we reasonably conclude that the desorption peak emerges at 315 °C for Ni and Ni<sub>3</sub>Zn catalysts could be assigned to interstitial H, which is absent in Ni<sub>3</sub>ZnCo<sub>0.7</sub> catalyst.

**Supplementary Note 2.** Selectivity in Supplementary Fig. 12 is calculated according to equations:

$$\text{Sele}_{\text{C}_2\text{H}_4} = \left( \frac{C_{\text{C}_2\text{H}_4,\text{out}}}{C_{\text{C}_2\text{H}_2,\text{in}} - C_{\text{C}_2\text{H}_2,\text{out}}} \right) \times 100\% \quad (1)$$

$$\text{Sele}_{\text{C}_2\text{H}_6} = \left( \frac{C_{\text{C}_2\text{H}_6,\text{out}}}{C_{\text{C}_2\text{H}_2,\text{in}} - C_{\text{C}_2\text{H}_2,\text{out}}} \right) \times 100\% \quad (2)$$

$$\text{Sele}_{\text{C}_4\text{H}_x} = \left( \frac{2C_{\text{C}_4\text{H}_x,\text{out}}}{C_{\text{C}_2\text{H}_2,\text{in}} - C_{\text{C}_2\text{H}_2,\text{out}}} \right) \times 100\% \quad (3)$$

The C<sub>4</sub>H<sub>x</sub> represents the overall polymerization product which contained the 1-butene, isobutene, cis-2-Butene, trans-2-butene and butadiene.

**Supplementary Note 3.** Selectivity in Supplementary Fig. 16 is calculated according to equations:

$$\text{Sele}_{\text{C}_2\text{H}_4} = \left( 1 - \frac{C_{\text{C}_2\text{H}_6,\text{out}}}{C_{\text{C}_2\text{H}_2,\text{in}} - C_{\text{C}_2\text{H}_2,\text{out}}} \right) \times 100\% \quad (4)$$

$$\text{Sele}_{\text{C}_2\text{H}_6} = \left( \frac{C_{\text{C}_2\text{H}_6,\text{out}}}{C_{\text{C}_2\text{H}_2,\text{in}} - C_{\text{C}_2\text{H}_2,\text{out}}} \right) \times 100\% \quad (5)$$

$$\text{Sele}_{\text{C}_4\text{H}_x} = \left( \frac{2C_{\text{C}_4\text{H}_x,\text{out}}}{C_{\text{C}_2\text{H}_2,\text{in}} - C_{\text{C}_2\text{H}_2,\text{out}}} \right) \times 100\% \quad (6)$$

The C<sub>4</sub>H<sub>x</sub> represents the overall polymerization product which contained the 1-butene, isobutene, cis-2-Butene, trans-2-butene and butadiene.

**Supplementary Note 4.** The cartesian coordinates of each atoms

(Ni<sub>3</sub>Zn<sub>1</sub>, model with a=b=c=3.58 Å, α=β=γ=90°)

|    |             |             |             |
|----|-------------|-------------|-------------|
| Ni | 1.789999962 | 1.789999962 | 0.000000000 |
| Ni | 0.000000000 | 1.789999962 | 1.789999962 |
| Ni | 1.789999962 | 0.000000000 | 1.789999962 |
| Zn | 0.000000000 | 0.000000000 | 0.000000000 |

(Ni<sub>3</sub>Zn<sub>1</sub>C<sub>1</sub>, model with a=b=c=3.66 Å, α=β=γ=90°)

|    |             |             |             |
|----|-------------|-------------|-------------|
| Zn | 0.000000000 | 0.000000000 | 0.000000000 |
| Ni | 0.000000000 | 1.830000043 | 1.830000043 |
| Ni | 1.830000043 | 0.000000000 | 1.830000043 |
| Ni | 1.830000043 | 1.830000043 | 0.000000000 |
| C  | 1.830000043 | 1.830000043 | 1.830000043 |

## Supplementary References

1. Liu, M. *et al.* Significant promotion of surface oxygen vacancies on bimetallic CoNi nanocatalysts for hydrodeoxygenation of biomass-derived vanillin to produce methylcyclohexanol. *ACS Sustainable Chem. Eng.* **8**, 6075-6089 (2020).
2. Yang, F. *et al.* Size dependence of vapor phase hydrodeoxygenation of m-Cresol on Ni/SiO<sub>2</sub> catalysts. *ACS Catal.* **8**, 1672-1682 (2018).
3. Aleksandrov, H. A., Kozlov, S. M., Schauermann, S., Vayssilov, G. N. & Neyman, K. M. How absorbed hydrogen affects the catalytic activity of transition metals. *Angew. Chem. Int. Ed.* **53**, 13371-13375 (2014).
